# Supplementary material
Source: PubMed Central journal article supplement (PMC5912686)
Supplement: NIHMS951402-supplement-supplement_1.pdf [file NIHMS951402-supplement-supplement_1.pdf]

**Supplementary Table 1**

Demographic and clinical characteristics of sibling control and T1DM groups

|                               | Control    | T1DM       |
|-------------------------------|------------|------------|
| <i>n</i>                      | 28         | 61         |
| Male/Female                   | 13/15      | 36/25      |
| Parental Education (years)    | 15.2 (1.8) | 15.0 (2.0) |
| Age at Time Point 1 (years)   | 10.9 (3.5) | 11.6 (3.0) |
| Age at diabetes onset (years) | ---        | 6.4 (3.0)  |

Means and (standard deviations). T1DM, type 1 diabetes mellitus.
